# Supplementary material
Source: publisher site journal article supplement (https://www.degruyterbrill.com/publication/isbn/9783110784299/downloadAsset/9783110784299_Table%2011.4_Cashflow-Waterfall%20of%20a%20Heat%20Pump.xlsx)
Supplement: Supplementary file 1 [file 9783110784299_Table%2011.4_Cashflow-Waterfall%20of%20a%20Heat%20Pump.xlsx]

## Sheet: Tab11.4
		Heat Pump Template
		1	2	3	4	5	6	7	8	9	10	11	12	13	14	15	16	17	18	19	20	21		Summe
		2025	2026	2027	2028	2029	2030	2031	2032	2033	2034	2035	2036	2037	2038	2039	2040	2041	2042	2043	2044	2045
	Energy Production	2500000	2500000	2500000	2500000	2500000	2500000	2500000	2500000	2500000	2500000	2500000	2500000	2500000	2500000	2500000	2500000	2500000	2500000	2500000	2500000	2500000		52500000
	Möglicher Vergütungssatz	0	0	0	0	0	0	0	0	0	0	0	0	0	0	0	0	0	0	0	0	0		0
	Vergütungssatz Freifläche	0	0	0	0	0	0	0	0	0	0	0	0	0	0	0	0	0	0	0	0	0		0
	Vermiedene Stromkosten	0	0	0	0	0	0	0	0	0	0	0	0	0	0	0	0	0	0	0	0	0		0
	Vergütungssatz Sonstige	0.03	0.03	0.03	0.03	0.03	0.03	0.03	0.03	0.03	0.03	0.03	0.03	0.03	0.03	0.03	0.03	0.03	0.03	0.03	0.03	0.03		0.63
	Freiflächenanlage	1	1	1	1	1	1	1	1	1	1	1	1	1	1	1	1	1	1	1	1	1		21
	Sonstige-PV	0	0	0	0	0	0	0	0	0	0	0	0	0	0	0	0	0	0	0	0	0		0
	Income (Heat Sale)	2625000	2703750	2.78486e+06	2.86841e+06	2.95446e+06	3.04309e+06	3.13439e+06	3.22842e+06	3.32527e+06	3.42503e+06	3.52778e+06	3.63361e+06	3.74262e+06	3.8549e+06	3.97055e+06	4.08966e+06	4.21235e+06	4.33873e+06	4.46889e+06	4.60295e+06	4.74104e+06		7.52758e+07
	Vergütung Sonstige PV	0	0	0	0	0	0	0	0	0	0	0	0	0	0	0	0	0	0	0	0	0		0
	Sum Income	2625000	2703750	2.78486e+06	2.86841e+06	2.95446e+06	3.04309e+06	3.13439e+06	3.22842e+06	3.32527e+06	3.42503e+06	3.52778e+06	3.63361e+06	3.74262e+06	3.8549e+06	3.97055e+06	4.08966e+06	4.21235e+06	4.33873e+06	4.46889e+06	4.60295e+06	4.74104e+06		7.52758e+07
	Maintenance	200000	206000	212180	218545	225102	231855	238810	245975	253354	260955	268783	276847	285152	293707	302518	311593	320941	330570	340487	350701	361222		5.7353e+06
	Electricity Costs Heat Pump p.a.	1.11111e+06	1.14444e+06	1.17878e+06	1.21414e+06	1.25057e+06	1.28808e+06	1.32672e+06	1.36653e+06	1.40752e+06	1.44975e+06	1.49324e+06	1.53804e+06	1.58418e+06	1.6317e+06	1.68066e+06	1.73107e+06	1.78301e+06	1.8365e+06	1.89159e+06	1.94834e+06	2.00679e+06		3.18628e+07
	Land lease	0	0	0	0	0	0	0	0	0	0	0	0	0	0	0	0	0	0	0	0	0		0
	Direct Marketing	0	0	0	0	0	0	0	0	0	0	0	0	0	0	0	0	0	0	0	0	0		0
	Insurance	0	0	0	0	0	0	0	0	0	0	0	0	0	0	0	0	0	0	0	0	0		0
	VAT-Interests	100700	0	0	0	0	0	0	0	0	0	0	0	0	0	0	0	0	0	0	0	0
	Other Costs	0	0	0	0	0	0	0	0	0	0	0	0	0	0	0	0	0	0	0	0	0		0
	Sum Operating Costs	1.41181e+06	1.35044e+06	1.39096e+06	1.43269e+06	1.47567e+06	1.51994e+06	1.56554e+06	1.6125e+06	1.66088e+06	1.7107e+06	1.76202e+06	1.81488e+06	1.86933e+06	1.92541e+06	1.98317e+06	2.04267e+06	2.10395e+06	2.16707e+06	2.23208e+06	2.29904e+06	2.36801e+06		3.76988e+07
	EBITDA	1.21319e+06	1.35331e+06	1.3939e+06	1.43572e+06	1.47879e+06	1.52316e+06	1.56885e+06	1.61592e+06	1.6644e+06	1.71433e+06	1.76576e+06	1.81873e+06	1.87329e+06	1.92949e+06	1.98737e+06	2.047e+06	2.10841e+06	2.17166e+06	2.23681e+06	2.30391e+06	2.37303e+06		3.7577e+07
	Depreciation	625000	625000	625000	625000	625000	625000	625000	625000	625000	625000	625000	625000	625000	625000	625000	625000	0	0	0	0	0		10000000
	EBIT	588189	728306	768905	810722	853794	898157	943852	990918	1.0394e+06	1.08933e+06	1.14076e+06	1.19373e+06	1.24829e+06	1.30449e+06	1.36237e+06	1.422e+06	2.10841e+06	2.17166e+06	2.23681e+06	2.30391e+06	2.37303e+06		2.7577e+07
	./. Allowance	24500	24500	24500	24500	24500	24500	24500	24500	24500	24500	24500	24500	24500	24500	24500	24500	24500	24500	24500	24500	24500		514500
	Business Income	563689	703806	744405	786222	829294	873657	919352	966418	1.0149e+06	1.06483e+06	1.11626e+06	1.16923e+06	1.22379e+06	1.27999e+06	1.33787e+06	1.3975e+06	2.08391e+06	2.14716e+06	2.21231e+06	2.27941e+06	2.34853e+06		2.70625e+07
	Tax Measurement Amount	28184.4	35190.3	37220.2	39311.1	41464.7	43682.9	45967.6	48320.9	50744.8	53241.3	55812.8	58461.5	61189.6	63999.5	66893.7	69874.8	104195	107358	110615	113971	117426		1.35313e+06
	Payable Business Income Tax	98645.6	123166	130271	137589	145126	152890	160887	169123	177607	186345	195345	204615	214163	223998	234128	244562	364684	375753	387154	398897	410993		4.73594e+06
	CFADS (after tax)	1.11454e+06	1.23014e+06	1.26363e+06	1.29813e+06	1.33367e+06	1.37027e+06	1.40797e+06	1.44679e+06	1.48679e+06	1.52798e+06	1.57041e+06	1.61411e+06	1.65913e+06	1.70549e+06	1.75325e+06	1.80243e+06	1.74372e+06	1.79591e+06	1.84965e+06	1.90501e+06	1.96204e+06		3.28411e+07
	Interest	308990	308990	293540	270960	248380	225800	203220	180640	158060	135480	112900	90320.2	67740.1	45160.1	22580	-5.55301e-11	-5.55301e-11	-5.55301e-11	-5.55301e-11	-5.55301e-11	-5.55301e-11		2.67276e+06
	Repayment	0	291500	426038	426038	426038	426038	426038	426038	426038	426038	426038	426038	426038	426038	426038	0	0	0	0	0	0		5.83e+06
	CFADS (after debt service)	805553	629650	544055	601134	659248	718428	778707	840116	902690	966464	1.03147e+06	1.09776e+06	1.16535e+06	1.23429e+06	1.30463e+06	1.80243e+06	1.74372e+06	1.79591e+06	1.84965e+06	1.90501e+06	1.96204e+06		2.43383e+07
	Target Value DSRA	300245	359789	348499	337209	325919	314629	303339	292049	280759	269469	258179	246889	235599	224309	-2.77651e-11	-2.77651e-11	-2.77651e-11	-2.77651e-11	-2.77651e-11	-2.77651e-11	0		4.09689e+06
	Built-up of DSR	300245	59544.5	0	0	0	0	0	0	0	0	0	0	0	0	0	0	0	0	0	0	0		359789
	Decrease of DSR	0	0	11290	11290	11290	11290	11290	11290	11290	11290	11290	11290	11290	11290	224309	0	0	0	0	0	0		359789
	Free CF	505308	570105	555345	612424	670538	729718	789997	851406	913980	977754	1.04276e+06	1.10905e+06	1.17664e+06	1.24558e+06	1.52894e+06	1.80243e+06	1.74372e+06	1.79591e+06	1.84965e+06	1.90501e+06	1.96204e+06		2.43383e+07
		2025	2026	2027	2028	2029	2030	2031	2032	2033	2034	2035	2036	2037	2038	2039	2040	2041	2042	2043	2044	2045		Mittelwert
	DSCR	3.60705	2.04856	1.75607	1.86246	1.97751	2.10216	2.2375	2.38478	2.54544	2.72116	2.9139	3.12596	3.36006	3.61948	3.9081	-3.24587e+16	-3.14014e+16	-3.23411e+16	-3.3309e+16	-3.4306e+16	-3.53328e+16		-6816326970309766
	DSCR (with DSRA)	3.60705	2.54856	2.25607	2.37866	2.51099	2.65412	2.80927	2.97783	3.16141	3.3619	3.58149	3.82274	4.08871	4.38304	4.7101	-3.89379e+16	-3.78806e+16	-3.88203e+16	-3.97882e+16	-4.07852e+16	-4.1812e+16		-8180364532572739
	DSRA	0	300245	359789	359789	359789	359789	359789	359789	359789	359789	359789	359789	359789	359789	359789	359789	359789	359789	359789	359789	359789		337719
	Abgezinste Betriebskosten	1.41181e+06	1.25904e+06	1.20904e+06	1.16102e+06	1.11491e+06	1.07063e+06	1.02811e+06	987275	948065	910412	874254	839533	806190	774172	743425	713899	685546	658320	632174	607067	582957
	Summe abgezinste Betriebskosten	1.90178e+07
			1.03
